# Supplementary material
Source: PubMed Central journal article supplement (PMC6496232)
Supplement: CPR-47-81-s001.pdf [file CPR-47-81-s001.pdf]

**Table S1 Primer sequences for Q-PCR analysis**

| Gene                            | Primer sequence (5'→3')                                             |
|---------------------------------|---------------------------------------------------------------------|
| <i>GAPDH</i>                    | Forward: AGACAGCCGCATCTTCTTGT<br>Reverse: TGATGGCAACAATGTCCACT      |
| <i>Runx2</i>                    | Forward: CCTGAACTCAGCACCAAGTCCT<br>Reverse: TCATCTGGCTCAGATAAGAGGG  |
| <i>OSX</i>                      | Forward: GGCTTTTCTGTGGCAAGAGGTT<br>Reverse: CGCTGATGTTTGCTCAAGTGGTC |
| <i>ALP</i>                      | Forward: CCAGAAAGACACGTTGACTGTGG<br>TCTTGTCCGTGTCGCTCACCAT          |
| <i>BMP2</i>                     | Forward: AACACCGTGCTCAGCTTCCATC<br>Reverse: CGAAAAATCTGGAGCTCTGCAG  |
| <i>OCN</i>                      | Forward: AGCTCAACCCCAATTGTGAC<br>TCCTGGAGAGTAGCCAAAGC               |
| <i>OPN</i>                      | Forward: GCTAAGCCTCAGCATCCTTG<br>Reverse: AAGCAAACCACTGCCAGTCT      |
| <i>Col I</i>                    | Forward: TGAACGTGACCAAAAACCAA<br>Reverse: AAGGAACAGAAAAGGCAGCA      |
| <i>Col III</i>                  | Forward: AGCTGGACCAAAAAGGTGATG<br>Reverse: GACCTCGTGCTCCAGTTAGC     |
| <i>PPAR<math>\gamma</math>2</i> | Forward: CATTTTTCAAGGGTGCCAGT<br>Reverse: GAGGCCAGCATGGTGTAGAT      |
| <i>TWIST</i>                    | Forward: CCCTCACACCTCTGCATTCT<br>Reverse: CAGTTTGATCCCAGCGTTTT      |

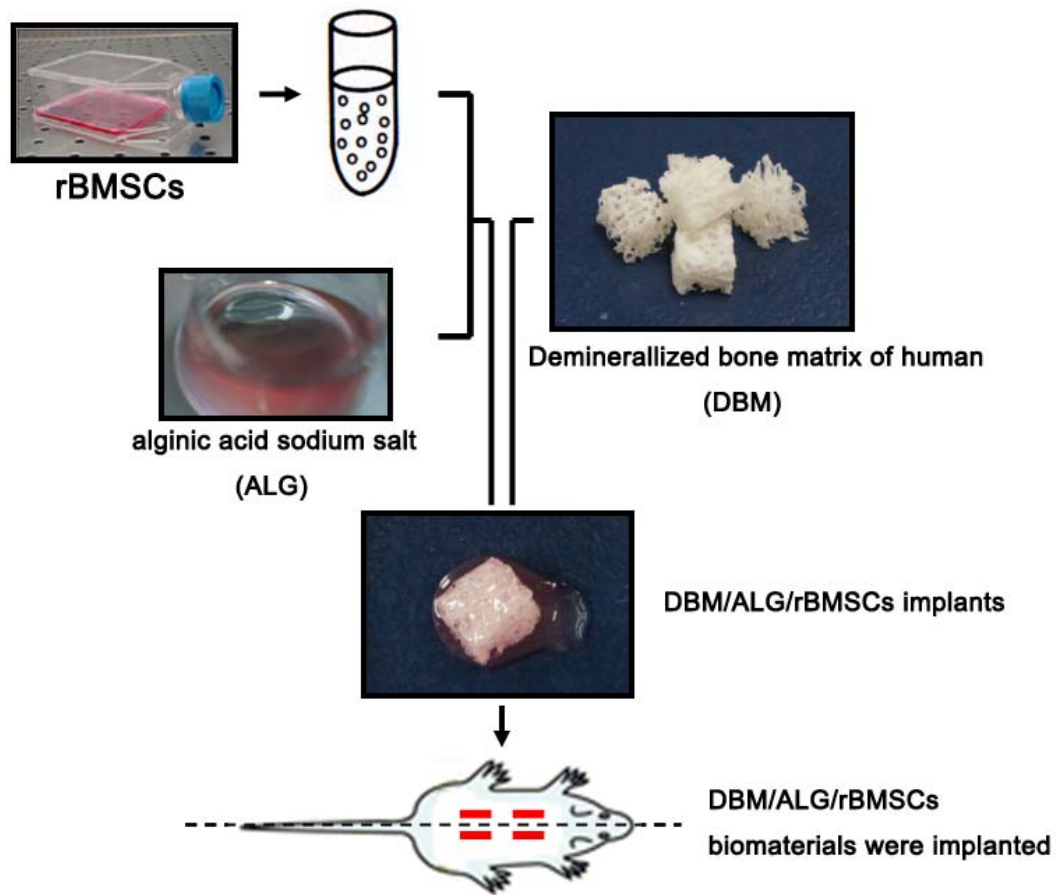

**Fig. S1 Ectopic bone formation test**

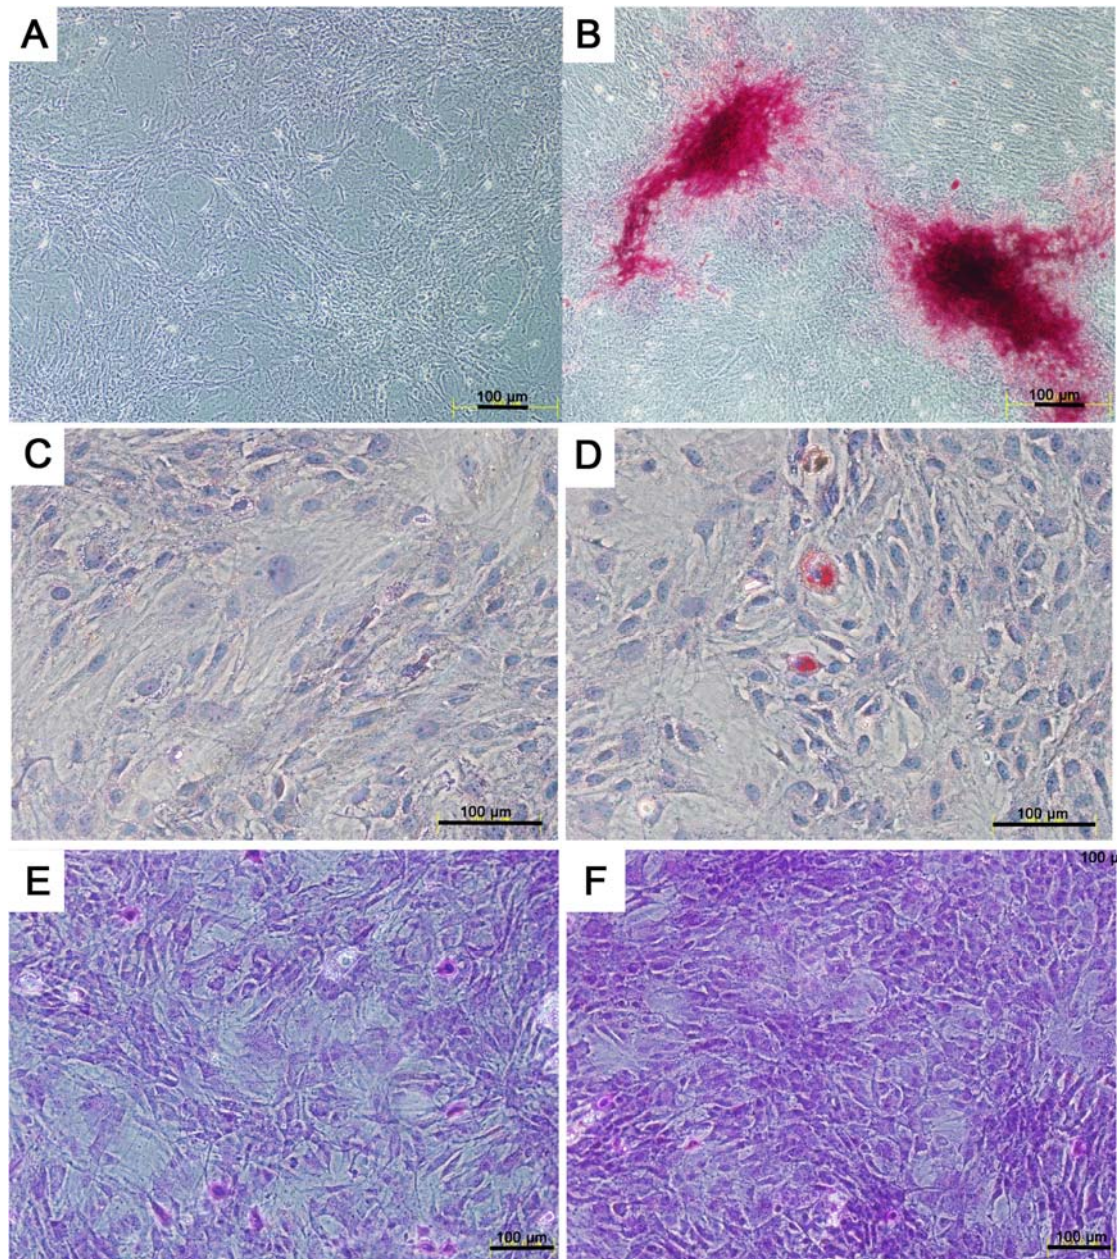

**Fig. S2 Osteogenic, adipogenic and chondrogenic differentiation of rBMSCs**  
Alizarin red staining after 21 days culture (A) control group and (B) osteogenesis induce group; Oil red staining after 10 days culture (C) control group and (D) adipogenesis induce group; toluidine blue staining after 21 days culture (E) control group and (F) chondrogenesis induce group. Scale bars represent 100 μm.

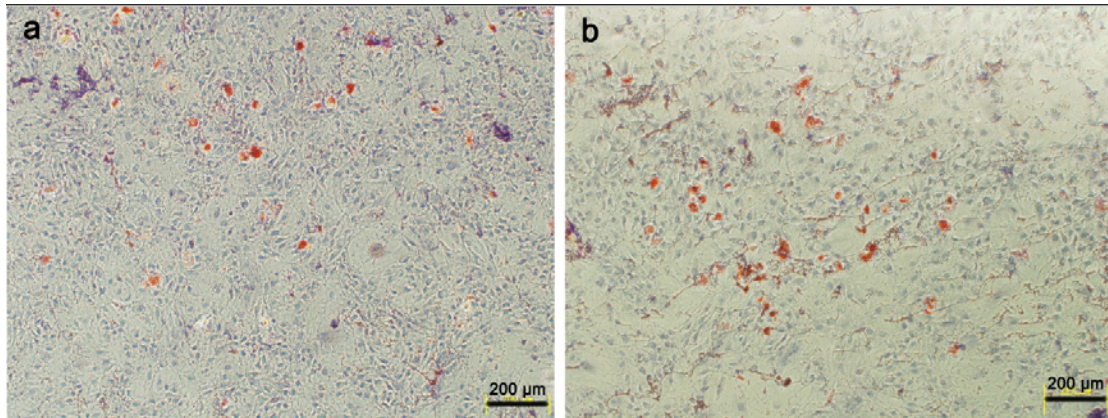

**Fig. S3 Effect of Cu on lipid droplet accumulation during adipogenic differentiation** lipid droplets of Control group (a) and Cu group (b) were visualized by Oil red staining. Scale bars represent 200  $\mu\text{m}$ , original magnification,  $\times 100$ .
